# Supplementary material for: Morning plasma cortisol as a cardiovascular risk factor: findings from prospective cohort and Mendelian randomization studies
Source: PubMed Central journal article supplement — Eur J Endocrinol. 2019 Jul 18;181(4):429–38. doi: 10.1530/EJE-19-0161 (PMC6733337; doi:10.1530/eje-19-0161), 2019-07-18
Supplement: supplementary_table_1.pdf [file supplementary_table_1.pdf]

**Table S1. Association of plasma cortisol with CVD in the combined VIP, MONICA and MSP cohort and BWHHS cohort with the same individuals in each model**

|                            | VIP, MONICA and MSP |          |                     |       | BWHHS |          |                     |      |
|----------------------------|---------------------|----------|---------------------|-------|-------|----------|---------------------|------|
|                            | Cases               | Controls | OR (95% CI)         | p     | Cases | Controls | OR (95% CI)         | p    |
| Unadjusted                 | 323                 | 492      | 1.16 (0.99 to 1.35) | 0.07  | 154   | 313      | 0.95 (0.78 to 1.16) | 0.78 |
| Adjusted                   | 323                 | 492      | 1.19 (1.01 to 1.41) | 0.04  | 154   | 313      | 0.99 (0.80 to 1.22) | 0.92 |
| Unadjusted and 0700h-1100h | 268                 | 396      | 1.19 (0.99 to 1.43) | 0.06  | 45    | 89       | 1.21 (0.80 to 1.83) | 0.36 |
| Adjusted and 0700h-1100h   | 268                 | 396      | 1.31 (1.07 to 1.60) | 0.009 | 45    | 89       | 1.13 (0.72 to 1.76) | 0.59 |

OR, odds ratio; CI, confidence intervals; p, p value. All models included the matching variables of age; for VIP, MONICA and MSP, all models included the matching variables of sex, study, and baseline assessment date. Adjusted models also included BMI, smoking and time of sampling in the regression models. Analyses were repeated restricted to individuals with blood sampling time between 0700h and 1100h.
