# Supplementary material for: Morning plasma cortisol as a cardiovascular risk factor: findings from prospective cohort and Mendelian randomization studies
Source: PubMed Central journal article supplement — Eur J Endocrinol. 2019 Jul 18;181(4):429–38. doi: 10.1530/EJE-19-0161 (PMC6733337; doi:10.1530/eje-19-0161), 2019-07-18
Supplement: supplementary_table_2.pdf [file supplementary_table_2.pdf]

**Table S2. Effect of including each confounder one-at-a-time on the associations of plasma cortisol with CVD in the combined VIP, MONICA and MSP cohort and BWHSS cohort with the same individuals in each model**

|                                           | VIP, MONICA and MSP |          |                     |      | BWHHS |          |                     |      |
|-------------------------------------------|---------------------|----------|---------------------|------|-------|----------|---------------------|------|
|                                           | Cases               | Controls | OR (95% CI)         | p    | Cases | Controls | OR (95% CI)         | p    |
| All sampling times included:              |                     |          |                     |      |       |          |                     |      |
| Unadjusted                                | 323                 | 492      | 1.16 (0.99 to 1.35) | 0.07 | 154   | 313      | 0.95 (0.78 to 1.16) | 0.62 |
| + BMI                                     | 323                 | 492      | 1.20 (1.02 to 1.40) | 0.03 | 154   | 313      | 0.97 (0.79 to 1.18) | 0.73 |
| + Smoking                                 | 323                 | 492      | 1.16 (0.99 to 1.36) | 0.07 | 154   | 313      | 0.93 (0.77 to 1.14) | 0.49 |
| + Time of sampling                        | 323                 | 492      | 1.14 (0.96 to 1.34) | 0.13 | 154   | 313      | 0.99 (0.81 to 1.21) | 0.90 |
| Adjusted                                  | 323                 | 492      | 1.19 (1.01 to 1.41) | 0.04 | 154   | 313      | 0.99 (0.80 to 1.22) | 0.92 |
| Sampling time restricted to 0700h -1100h: |                     |          |                     |      |       |          |                     |      |
| Unadjusted                                | 268                 | 396      | 1.19 (0.91 to 1.43) | 0.06 | 45    | 89       | 1.21 (0.80 to 1.83) | 0.36 |
| + BMI                                     | 268                 | 396      | 1.26 (1.04 to 1.53) | 0.02 | 45    | 89       | 1.23 (0.81 to 1.87) | 0.33 |
| + Smoking                                 | 268                 | 396      | 1.19 (0.99 to 1.44) | 0.06 | 45    | 89       | 1.16 (0.76 to 1.76) | 0.50 |
| + Time of sampling                        | 268                 | 396      | 1.22 (1.00 to 1.48) | 0.04 | 45    | 89       | 1.17 (0.76 to 1.79) | 0.48 |
| Adjusted                                  | 268                 | 396      | 1.31 (1.07 to 1.60) | 0.01 | 45    | 89       | 1.13 (0.72 to 1.76) | 0.59 |

OR, odds ratio; CI, confidence intervals; p, p value. All models included the matching variables of age; for VIP, MONICA and MSP, all models included the matching variables of sex, study, and baseline assessment date. Adjusted models also included BMI, smoking and time of sampling in the regression models. Analyses were repeated restricted to individuals with blood sampling time between 0700h and 1100h.
