# Supplementary material for: Morning plasma cortisol as a cardiovascular risk factor: findings from prospective cohort and Mendelian randomization studies
Source: PubMed Central journal article supplement — Eur J Endocrinol. 2019 Jul 18;181(4):429–38. doi: 10.1530/EJE-19-0161 (PMC6733337; doi:10.1530/eje-19-0161), 2019-07-18
Supplement: supplementary_table_3.pdf [file supplementary_table_3.pdf]

**Table S3. Effect of including each confounder one-at-a-time on the associations of plasma cortisol with CVD in the imputed dataset of the combined VIP, MONICA and MSP cohort**

|                                            | VIP, MONICA and MSP |          |                     |      |
|--------------------------------------------|---------------------|----------|---------------------|------|
|                                            | Cases               | Controls | OR (95% CI)         | P    |
| All sampling times included:               |                     |          |                     |      |
| Unadjusted                                 | 905                 | 1717     | 1.00 (0.91 to 1.09) | 0.91 |
| + BMI                                      | 905                 | 1717     | 1.03 (0.94 to 1.13) | 0.53 |
| + Smoking                                  | 905                 | 1717     | 1.01 (0.92 to 1.10) | 0.81 |
| + Time of sampling                         | 905                 | 1717     | 1.00 (0.91 to 1.11) | 0.95 |
| Adjusted                                   | 905                 | 1717     | 1.06 (0.96 to 1.17) | 0.24 |
| Sampling time restricted to 0700h - 1100h: |                     |          |                     |      |
| Unadjusted                                 | 702                 | 1109     | 1.05 (0.94 to 1.17) | 0.39 |
| + BMI                                      | 702                 | 1109     | 1.10 (0.98 to 1.23) | 0.12 |
| + Smoking                                  | 702                 | 1109     | 1.06 (0.95 to 1.19) | 0.30 |
| + Time of sampling                         | 702                 | 1109     | 1.05 (0.94 to 1.18) | 0.41 |
| Adjusted                                   | 702                 | 1109     | 1.12 (0.99 to 1.26) | 0.07 |

OR, odds ratio; CI, confidence intervals; p, p value. All models included the matching variables of age, sex, study and baseline assessment date. Analyses were repeated restricted to individuals with blood sampling time between 0700h and 1100h.
