# Supplementary material for: Morning plasma cortisol as a cardiovascular risk factor: findings from prospective cohort and Mendelian randomization studies
Source: PubMed Central journal article supplement — Eur J Endocrinol. 2019 Jul 18;181(4):429–38. doi: 10.1530/EJE-19-0161 (PMC6733337; doi:10.1530/eje-19-0161), 2019-07-18
Supplement: supplementary_table_4.pdf [file supplementary_table_4.pdf]

**Table S4. Missing data in the VIP, MONICA and MSP cohort**

| Variable        | Missing, n (%) |
|-----------------|----------------|
| Plasma cortisol | 0 (0)          |
| Sampling time   | 1371 (52.3)    |
| BMI             | 69 (2.6)       |
| Smoking         | 97 (3.7)       |
| Sex             | 0 (0)          |
| Age             | 0 (0)          |
| Survey date     | 0 (0)          |
| Cohort          | 0 (0)          |
| Fasting glucose | 266 (10.1)     |
| Leptin          | 42 (1.6)       |

BMI, body mass index.
