# Supplementary material for: Morning plasma cortisol as a cardiovascular risk factor: findings from prospective cohort and Mendelian randomization studies
Source: PubMed Central journal article supplement — Eur J Endocrinol. 2019 Jul 18;181(4):429–38. doi: 10.1530/EJE-19-0161 (PMC6733337; doi:10.1530/eje-19-0161), 2019-07-18
Supplement: supplementary_table_5.pdf [file supplementary_table_5.pdf]

**Table S5. Associations with missing sampling time in the VIP, MONICA and MSP cohort**

|                           | No missing sampling time<br>(n=1251) | Missing sampling time<br>(n=1371) | p      |
|---------------------------|--------------------------------------|-----------------------------------|--------|
| Cortisol, nmol/l          | 528 (185)                            | 524 (187)                         | 0.59   |
| Age, years                | 54.5 (7.3)                           | 54.2 (8.3)                        | 0.43   |
| Male                      | 873 (70)                             | 1018 (74)                         | 0.01   |
| BMI, kg/m <sup>2</sup>    | 26.5 (3.9)                           | 26.1 (3.6)                        | 0.002  |
| Smoking                   | 291 (24)                             | 238 (25)                          | 0.72   |
| Case-control cohort       |                                      |                                   |        |
| Castro1                   | 152 (12)                             | 130 (9)                           |        |
| Castro2                   | 474 (38)                             | 318 (23)                          |        |
| FIA1                      | 90 (7)                               | 100 (7)                           |        |
| FIA2                      | 535 (43)                             | 823 (60)                          | <0.001 |
| Case (MI or stroke)       | 445 (36)                             | 460 (34)                          | 0.28   |
| MI                        | 230 (52)                             | 306 (67)                          | <0.001 |
| Ischemic stroke           | 178 (83)                             | 128 (83)                          | 0.94   |
| Survey Date, days (SD)    | 12139 (838)                          | 11891 (943)                       | <0.001 |
| Fasted >8 hours           | 1000 (80)                            | 665 (49)                          | <0.001 |
| HDL cholesterol, nmol/l   | 1.40 (1.39)                          | 1.27 (0.36)                       | 0.10   |
| Total cholesterol, nmol/l | 6.29 (1.26)                          | 6.03 (1.29)                       | 0.81   |
| Fasting glucose, nmol/l   | 5.55 (1.46)                          | 5.36 (1.24)                       | 0.0006 |
| Postload glucose, nmol/l  | 6.75 (1.99)                          | 6.62 (2.10)                       | 0.10   |
| Hypertension              | 660 (59)                             | 666 (55)                          | 0.07   |
| Leptin, nmol/l            | 9.49 (9.40)                          | 8.20 (7.92)                       | 0.0002 |

BMI, body mass index; MI, myocardial infarction; SD, standard deviation; p, p value. For continuous variables the mean and SD are presented; for binary variables the number and percentage are presented. Castro1, Castro2, FIA1 and FIA2 are case-control studies within the VIP, MONICA and MSP cohort.
