# Supplementary material for: Morning plasma cortisol as a cardiovascular risk factor: findings from prospective cohort and Mendelian randomization studies
Source: PubMed Central journal article supplement — Eur J Endocrinol. 2019 Jul 18;181(4):429–38. doi: 10.1530/EJE-19-0161 (PMC6733337; doi:10.1530/eje-19-0161), 2019-07-18
Supplement: supplementary_table_6.pdf [file supplementary_table_6.pdf]

**Table S6. Variables used in multivariable imputation models in the VIP, MONICA and MSP cohort**

| Variable                        | Type of variable | Model used to predict missing data in this variable | Classification of variable to predict missing data in other variables |
|---------------------------------|------------------|-----------------------------------------------------|-----------------------------------------------------------------------|
| Case                            | Binary           | N/A no missing                                      | Binary                                                                |
| Cortisol                        | Continuous       | N/A no missing                                      | Continuous                                                            |
| Sex                             | Binary           | N/A no missing                                      | Binary                                                                |
| Age                             | Continuous       | N/A no missing                                      | Continuous                                                            |
| Survey date                     | Continuous       | N/A no missing                                      | Continuous                                                            |
| Cohort                          | Categorical      | N/A no missing                                      | Categorical                                                           |
| Smoking                         | Binary           | Logistic regression                                 | Binary                                                                |
| BMI                             | Continuous       | Linear regression                                   | Continuous                                                            |
| Sampling time                   | Continuous       | Linear regression (truncated lower limit of 0)      | Continuous                                                            |
| Log transformed fasting glucose | Continuous       | Linear regression                                   | Continuous                                                            |
| Log transformed leptin          | Continuous       | Linear regression                                   | Continuous                                                            |

BMI, body mass index.
