# Supplementary material for: Morning plasma cortisol as a cardiovascular risk factor: findings from prospective cohort and Mendelian randomization studies
Source: PubMed Central journal article supplement — Eur J Endocrinol. 2019 Jul 18;181(4):429–38. doi: 10.1530/EJE-19-0161 (PMC6733337; doi:10.1530/eje-19-0161), 2019-07-18
Supplement: supplementary_table_7.pdf [file supplementary_table_7.pdf]

**Table S7. Distributions of imputed variables in the imputed datasets and in the observed data (with no imputation) in the VIP, MONICA and MSP cohort**

|                                    | % data imputed | Distribution                                                      |                                    |
|------------------------------------|----------------|-------------------------------------------------------------------|------------------------------------|
|                                    |                | Mean (SD) for continuous variables<br>% for categorical variables |                                    |
|                                    |                | Imputed datasets                                                  | Observed (with no missing) dataset |
| Sampling time (minutes from 0700h) | 52.3           | 144.9 (113.9)                                                     | 129.0 (103.4)                      |
| BMI (kg/m <sup>2</sup> )           | 2.6            | 26.3 (3.8)                                                        | 26.3 (3.8)                         |
| Smoking                            | 3.7            | 24.7                                                              | 24.5                               |
| Fasting glucose                    | 10.1           | 1.67 (0.19)                                                       | 1.67 (0.19)                        |
| Leptin                             | 1.6            | 1.84 (0.80)                                                       | 1.84 (0.80)                        |

BMI, body mass index.
