# Supplementary material for: Morning plasma cortisol as a cardiovascular risk factor: findings from prospective cohort and Mendelian randomization studies
Source: PubMed Central journal article supplement — Eur J Endocrinol. 2019 Jul 18;181(4):429–38. doi: 10.1530/EJE-19-0161 (PMC6733337; doi:10.1530/eje-19-0161), 2019-07-18
Supplement: supplementary_table_8.pdf [file supplementary_table_8.pdf]

**Table S8. Association of plasma cortisol with CVD in the imputed dataset of the VIP, MONICA and MSP cohort**

|                            | VIP, MONICA and MSP |          |                     |      |
|----------------------------|---------------------|----------|---------------------|------|
|                            | Cases               | Controls | OR (95% CI)         | p    |
| Unadjusted                 | 905                 | 1717     | 1.00 (0.91 to 1.09) | 0.91 |
| Adjusted                   | 905                 | 1717     | 1.06 (0.96 to 1.17) | 0.24 |
| Unadjusted and 0700h-1100h | 702                 | 1109     | 1.05 (0.94 to 1.17) | 0.39 |
| Adjusted and 0700h-1100h   | 702                 | 1109     | 1.12 (0.99 to 1.26) | 0.07 |

OR, odds ratio; CI, confidence intervals; p, p value. All models included the matching variables of age, sex, study, and baseline assessment date. Adjusted models also included BMI, smoking and time of sampling in the regression models. The analyses using the imputed data include 2622 participants. Analyses were repeated restricted to individuals with blood sampling time between 0700h and 1100h for which sample sizes vary between 1811 and 1958.
