# Supplementary material for: Morning plasma cortisol as a cardiovascular risk factor: findings from prospective cohort and Mendelian randomization studies
Source: PubMed Central journal article supplement — Eur J Endocrinol. 2019 Jul 18;181(4):429–38. doi: 10.1530/EJE-19-0161 (PMC6733337; doi:10.1530/eje-19-0161), 2019-07-18
Supplement: supplementary_table_9.pdf [file supplementary_table_9.pdf]

**Table S9. Case classification and covariates included in the multivariable regression of prospective studies meta-analysis**

| Study                                 | Outcome       | Case classification                                                                                          | Covariates included in regression model                                                                                |
|---------------------------------------|---------------|--------------------------------------------------------------------------------------------------------------|------------------------------------------------------------------------------------------------------------------------|
| VIP, MONICA and MSP <sup>3,4</sup>    | Fatal CVD     | ICD 8 and 9 codes: 414 and 798–799<br>ICD 10: I25 and R96–99                                                 | Age, sex, study, baseline assessment date, smoking, BMI and time of sampling                                           |
|                                       | Non-fatal CVD | ICD 8 and 9 codes: 410-413 and 430-438<br>ICD 10 codes: I20-I24 and I60-69                                   |                                                                                                                        |
| BWHHS <sup>20</sup>                   | Fatal CHD     | ICD10 codes: I20-I25, I51.6                                                                                  | Age, smoking, BMI and time of sampling                                                                                 |
|                                       | Non-fatal CHD | MI (defined according to WHO criteria), first diagnosis of angina or coronary artery by-pass or angioplasty. |                                                                                                                        |
| Caerphilly <sup>8</sup>               | Fatal IHD     | ICD-9 codes: 410 to 414                                                                                      | Age, smoking, adult social class, alcohol consumption, height, FEV1/height <sup>2</sup> , fibrinogen, white cell count |
|                                       | Non-fatal IHD | ICD-9 codes: 410 to 414                                                                                      |                                                                                                                        |
| Vietnam Experience Study <sup>9</sup> | Fatal CVD     | ICD-9 codes: 390–434 and 436–448<br>ICD-10 codes: I00–I78                                                    | None                                                                                                                   |

ICD, International Classification of Disease
