# Supplementary material for: Morning plasma cortisol as a cardiovascular risk factor: findings from prospective cohort and Mendelian randomization studies
Source: PubMed Central journal article supplement — Eur J Endocrinol. 2019 Jul 18;181(4):429–38. doi: 10.1530/EJE-19-0161 (PMC6733337; doi:10.1530/eje-19-0161), 2019-07-18
Supplement: supplementary_table_10.pdf [file supplementary_table_10.pdf]

**Table S10. Leave one out meta-analysis of prospective multivariable regression association of morning plasma cortisol with cardiovascular disease**

| Excluded study      | OR (95% CI)         |
|---------------------|---------------------|
| VIP, MONICA and MSP | 1.13 (1.01 to 1.27) |
| BWHHS               | 1.21 (1.04 to 1.39) |
| Caerphilly          | 1.31 (1.11 to 1.53) |
| Vietnam             | 1.16 (1.04 to 1.29) |
| D+L pooled estimate | 1.18 (1.06 to 1.31) |

OR, odds ratio; CI, confidence interval; D+L, DerSimonian and Laird.
