# Supplementary material for: Morning plasma cortisol as a cardiovascular risk factor: findings from prospective cohort and Mendelian randomization studies
Source: PubMed Central journal article supplement — Eur J Endocrinol. 2019 Jul 18;181(4):429–38. doi: 10.1530/EJE-19-0161 (PMC6733337; doi:10.1530/eje-19-0161), 2019-07-18
Supplement: supplementary_table_11.pdf [file supplementary_table_11.pdf]

**Table S11. Association of the genetic variants comprising the instrumental variable for morning plasma cortisol used in the Mendelian randomization analyses with potential confounders included in multivariable regression models in the VIP, MONICA and MSP cohort**

|                                   | Age, years<br>(95% CI) | Sex<br>(95% CI)       | Survey date, days<br>(95% CI) | Cohort<br>(95% CI)    | BMI<br>(95% CI)       | Sampling time,<br>minutes (95% CI) | Smoking<br>(95% CI)   |
|-----------------------------------|------------------------|-----------------------|-------------------------------|-----------------------|-----------------------|------------------------------------|-----------------------|
| rs12589136                        | -0.27 (-0.81 to 0.28)  | -0.08 (-0.23 to 0.08) | 21.69 (-40.08 to 83.46)       | 0.04 (-0.04 to 0.11)  | -0.20 (-0.47 to 0.06) | -1.76 (-11.91 to 8.39)             | 0.10 (-0.06 to 0.26)  |
| rs2749529                         | -0.20 (-0.63 to 0.24)  | -0.03 (-0.15 to 0.10) | 29.90 (-18.91 to 78.71)       | 0.05 (-0.02 to 0.11)  | -0.02 (-0.23 to 0.19) | -0.31 (-8.61 to 7.98)              | 0.06 (-0.07 to 0.19)  |
| rs11621961                        | 0.05 (-0.40 to 0.49)   | 0.01 (-0.11 to 0.14)  | 26.95 (-23.54 to 77.43)       | -0.03 (-0.09 to 0.03) | -0.03 (-0.24 to 0.19) | -5.77 (-14.15 to 2.60)             | -0.03 (-0.16 to 0.11) |
| Fixed-effects<br>(IV pooled ES)   | -0.13 (-0.39 to 0.14)  | -0.02 (-0.10 to 0.05) | 26.82 (-3.69 to 57.33)        | 0.02 (-0.02 to 0.06)  | -0.07 (-0.20 to 0.06) | -2.70 (-7.80 to 2.40)              | 0.04 (-0.04 to 0.12)  |
| Random-effects<br>(D+L pooled ES) | -0.13 (-0.39 to 0.14)  | -0.02 (-0.10 to 0.05) | 26.82 (-3.69 to 57.33)        | 0.02 (-0.03 to 0.07)  | -0.07 (-0.20 to 0.06) | -2.70 (-7.80 to 2.40)              | 0.04 (-0.04 to 0.12)  |

CI, confidence interval; IV, inverse variance; ES, effect size; D+L, DerSimonian and Laird. Effect estimates are the difference in means per allele associated with higher morning plasma cortisol
