# Supplementary material for: Morning plasma cortisol as a cardiovascular risk factor: findings from prospective cohort and Mendelian randomization studies
Source: PubMed Central journal article supplement — Eur J Endocrinol. 2019 Jul 18;181(4):429–38. doi: 10.1530/EJE-19-0161 (PMC6733337; doi:10.1530/eje-19-0161), 2019-07-18
Supplement: supplementary_table_12.pdf [file supplementary_table_12.pdf]

**Table S12. Association between the genetic instrumental variable for morning plasma cortisol with morning plasma cortisol and potential confounders in publicly available GWAS consortia**

| Outcome                   | Consortium | Year | Effect estimate | LCI    | UCI    | p        |
|---------------------------|------------|------|-----------------|--------|--------|----------|
| Morning plasma cortisol   | CORNET     | 2014 | 0.090           | 0.070  | 0.100  | 6.05e-28 |
| Ever vs never smoked      | TAG        | 2010 | -0.009          | -0.024 | 0.006  | 0.263    |
| Cigarettes smoked per day | TAG        | 2010 | -0.106          | -0.210 | -0.001 | 0.047    |
| Total cholesterol         | GLGC       | 2013 | -0.006          | -0.012 | 0.000  | 0.054    |
| HDL cholesterol           | GLGC       | 2013 | -0.002          | -0.008 | 0.004  | 0.489    |
| LDL cholesterol           | GLGC       | 2013 | -0.007          | -0.013 | 0.000  | 0.042    |
| Triglycerides             | GLGC       | 2013 | 0.003           | -0.003 | 0.009  | 0.305    |
| Fasting glucose           | MAGIC      | 2010 | -0.004          | -0.008 | 0.001  | 0.140    |
| 2hr glucose               | MAGIC      | 2010 | 0.003           | -0.021 | 0.026  | 0.828    |
| Type 2 diabetes           | DIAGRAM    | 2014 | 0.019           | 0.003  | 0.035  | 0.021    |
| Waist-to-hip ratio        | GIANT      | 2015 | 0.005           | -0.001 | 0.010  | 0.092    |
| Overweight                | GIANT      | 2013 | -0.013          | -0.025 | -0.002 | 0.019    |
| Weight                    | GIANT      | 2013 | -0.007          | -0.016 | 0.001  | 0.068    |
| Waist circumference       | GIANT      | 2015 | 0.002           | -0.003 | 0.007  | 0.486    |
| Obesity class 1           | GIANT      | 2013 | -0.010          | -0.026 | 0.005  | 0.184    |
| Obesity class 2           | GIANT      | 2013 | -0.001          | -0.025 | 0.022  | 0.907    |
| Obesity class 3           | GIANT      | 2013 | -0.002          | -0.046 | 0.042  | 0.921    |
| Body mass index           | GIANT      | 2015 | 0.000           | -0.004 | 0.005  | 0.874    |
| Body fat                  | NA         | 2016 | 0.004           | -0.002 | 0.011  | 0.204    |

LCI, 95% lower confidence interval; UCI, 95% upper confidence interval; HDL, high density lipoprotein; LDL, low density lipoprotein. Effect estimates are either the log Odds ratio (for binary outcome) or mean difference (for continuous outcome) from a random-effects meta-analysis. If multiple studies exist, the association is from the largest sample in a European population.
