# Supplementary material for: Morning plasma cortisol as a cardiovascular risk factor: findings from prospective cohort and Mendelian randomization studies
Source: PubMed Central journal article supplement — Eur J Endocrinol. 2019 Jul 18;181(4):429–38. doi: 10.1530/EJE-19-0161 (PMC6733337; doi:10.1530/eje-19-0161), 2019-07-18
Supplement: supplementary_table_13.pdf [file supplementary_table_13.pdf]

**Table S13. Association of morning plasma cortisol on CHD from alternative two-sample Mendelian randomization approaches**

| Method                      | OR (95% CI)                                |
|-----------------------------|--------------------------------------------|
| Weighted mode               | 1.06 (0.94 to 1.19)                        |
| Maximum likelihood          | 1.06 (0.98 to 1.15)                        |
| Inverse variance weighted   | 1.06 (0.98 to 1.15)                        |
| Weighted median             | 1.06 (0.96 to 1.17)                        |
| MR-Egger – slope; intercept | 0.80 (0.43 to 1.49); 0.03, se 0.03, p=0.53 |

OR, odds ratio; CI, confidence interval; MR, Mendelian randomization; se, standard error; p, p value.
