# Supplementary material for: Morning plasma cortisol as a cardiovascular risk factor: findings from prospective cohort and Mendelian randomization studies
Source: PubMed Central journal article supplement — Eur J Endocrinol. 2019 Jul 18;181(4):429–38. doi: 10.1530/EJE-19-0161 (PMC6733337; doi:10.1530/eje-19-0161), 2019-07-18
Supplement: supplementary_table_14.pdf [file supplementary_table_14.pdf]

**Table S14. Association of morning plasma cortisol on CHD adjusting for possible risk factors from two-sample multivariable Mendelian randomization analyses**

| Exposures               | No. of SNPs | OR   | LCI  | UCI  | p        |
|-------------------------|-------------|------|------|------|----------|
| Morning plasma cortisol | 3           | 1.04 | 0.94 | 1.15 | 0.44     |
| Type 2 Diabetes         | 46          | 1.09 | 1.06 | 1.12 | 9.89E-13 |
| Morning plasma cortisol | 3           | 1.09 | 0.97 | 1.22 | 0.16     |
| Overweight              | 20          | 1.20 | 1.14 | 1.26 | 1.68E-11 |
| Morning plasma cortisol | 3           | 1.04 | 0.73 | 1.48 | 0.83     |
| Cigarettes per day      | 6           | 0.98 | 0.95 | 1.00 | 0.09     |
| Morning plasma cortisol | 3           | 1.03 | 0.93 | 1.14 | 0.56     |
| LDL Cholesterol         | 303         | 1.47 | 1.41 | 1.52 | 2.33E-97 |

SNP, single nucleotide polymorphism; OR, odds ratio; LCI, 95% lower confidence interval; UCI, 95% upper confidence interval; p, p value; LDL, low density lipoprotein. Morning plasma cortisol from CORNET consortium (n=12,597). Overweight (BMI) from GIANT consortium (cases=93,015, controls=65,840). Cigarettes smoked per day from TAG consortium (n=68,028). LDL cholesterol from GLGC (n=173,082).
