# Supplementary figures and images for: Morning plasma cortisol as a cardiovascular risk factor: findings from prospective cohort and Mendelian randomization studies
Source: PubMed Central journal article supplement — Eur J Endocrinol. 2019 Jul 18;181(4):429–38. doi: 10.1530/EJE-19-0161 (PMC6733337; doi:10.1530/eje-19-0161), 2019-07-18

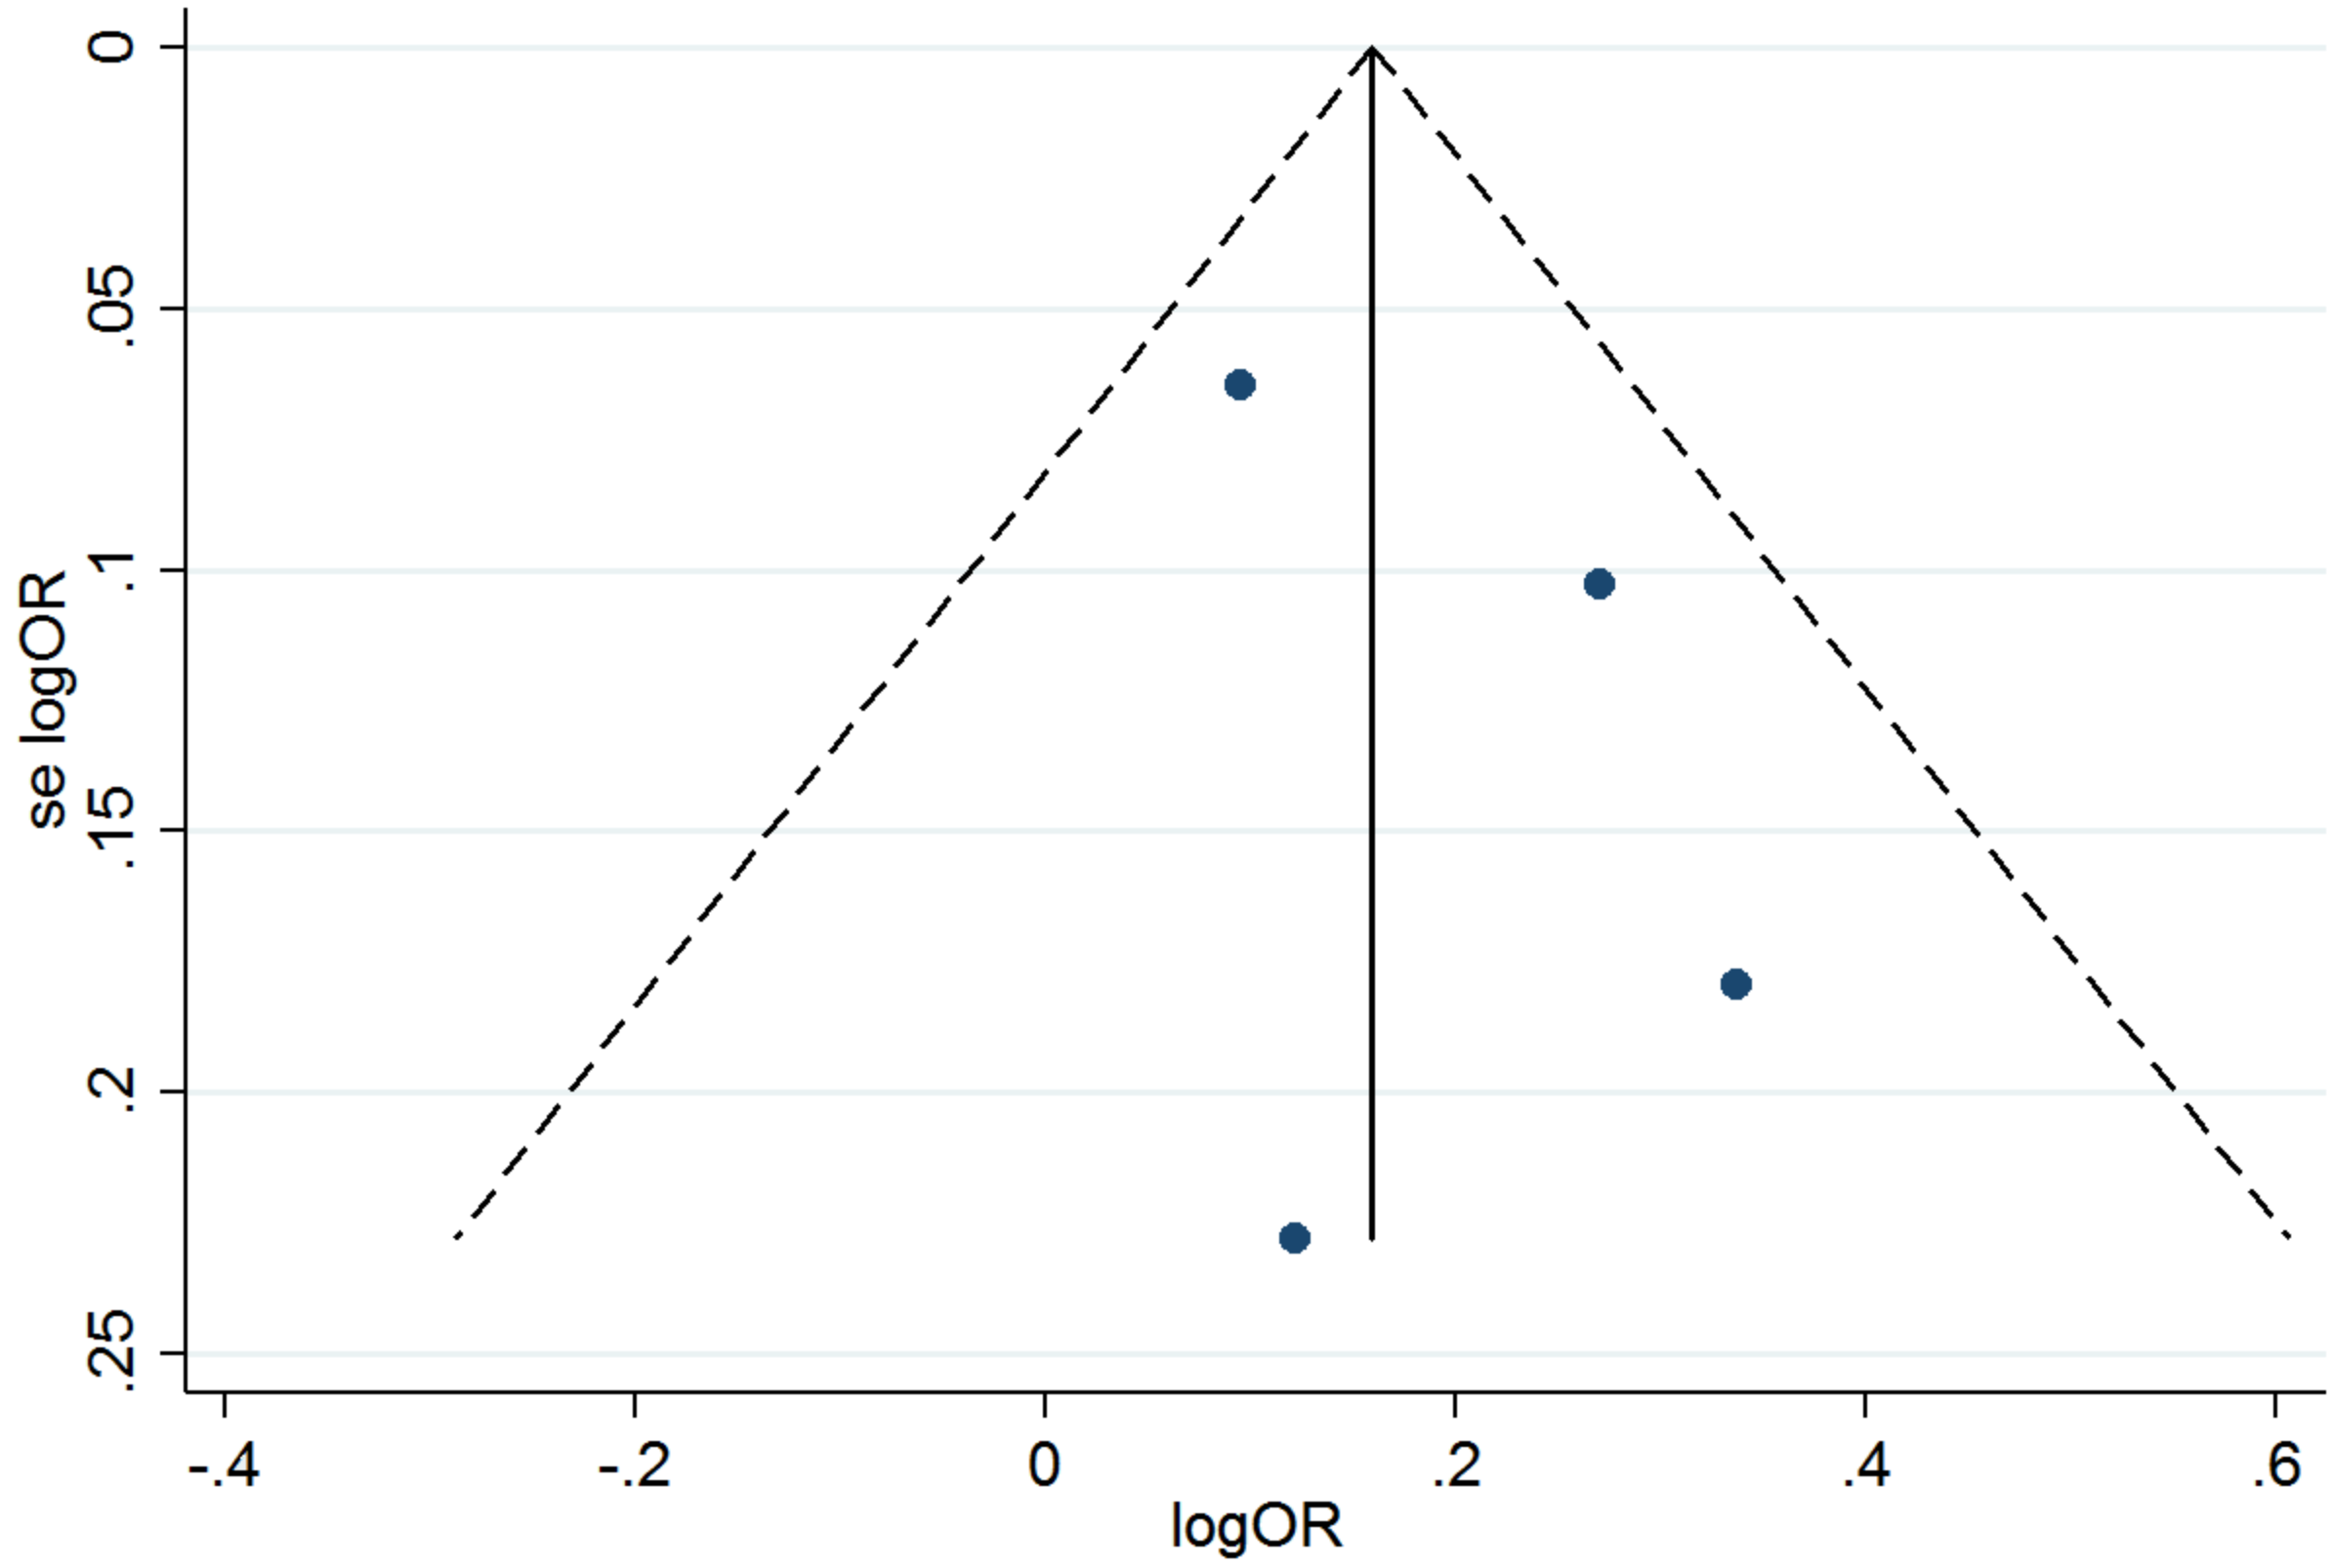

Supplement: supplementary_figure_1.pdf [file supplementary_figure_1.pdf]
